# Supplementary material
Source: MDPI journal article supplement (https://www.mdpi.com/2227-9040/9/11/327)
Supplement: s1 [file s1]

Supporting information for:

# Facile detection and quantification of acetamiprid using a portable Raman spectrometer combined with self-assembled gold nanoparticle array

Panxue Wang<sup>1</sup>, Yan Sun<sup>1</sup>, Li Wang<sup>1</sup>, Xiang Li<sup>1</sup>, Miaomiao Liu<sup>1</sup>, Guoliang Li<sup>1\*</sup>

School of Food and Biological Engineering, Shaanxi University of Science & Technology, Xi'an 710021, P.R. China.

\*Correspondence: [liguoliang@sust.edu.cn](mailto:liguoliang@sust.edu.cn)

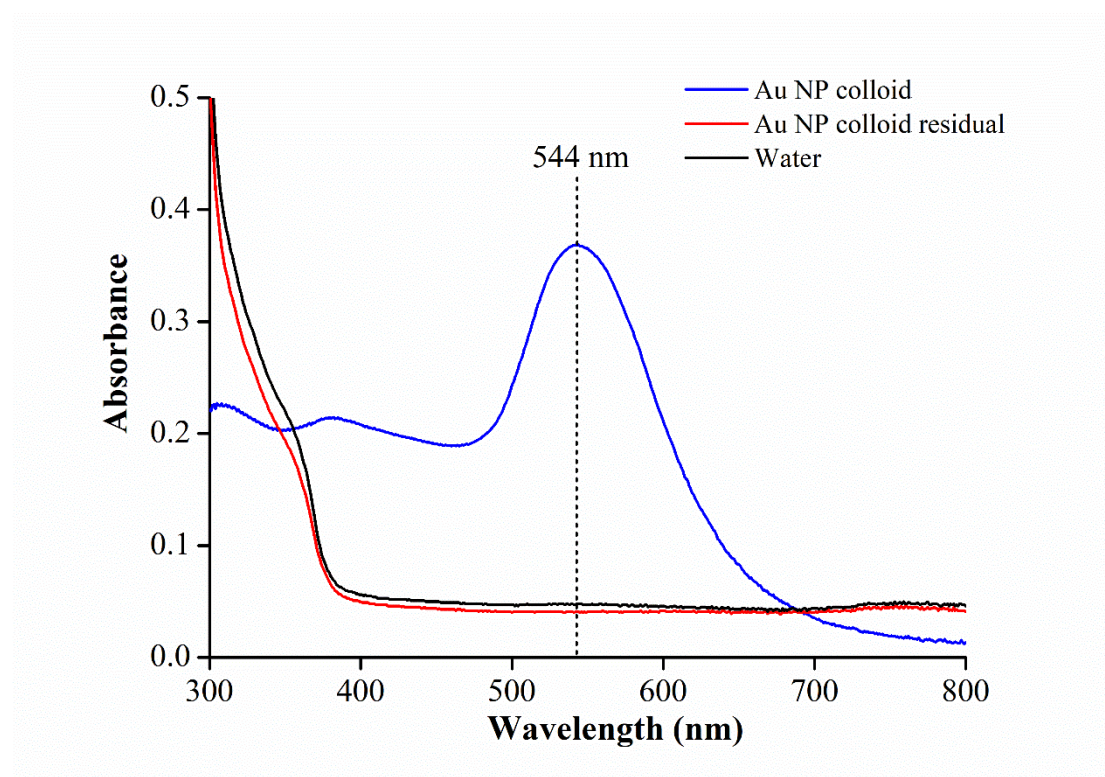

**Figure. S1.** UV-vis spectrum of Au NP colloid (positive control), residual of Au NP colloid after the formation of Au NP array and water (negative control).

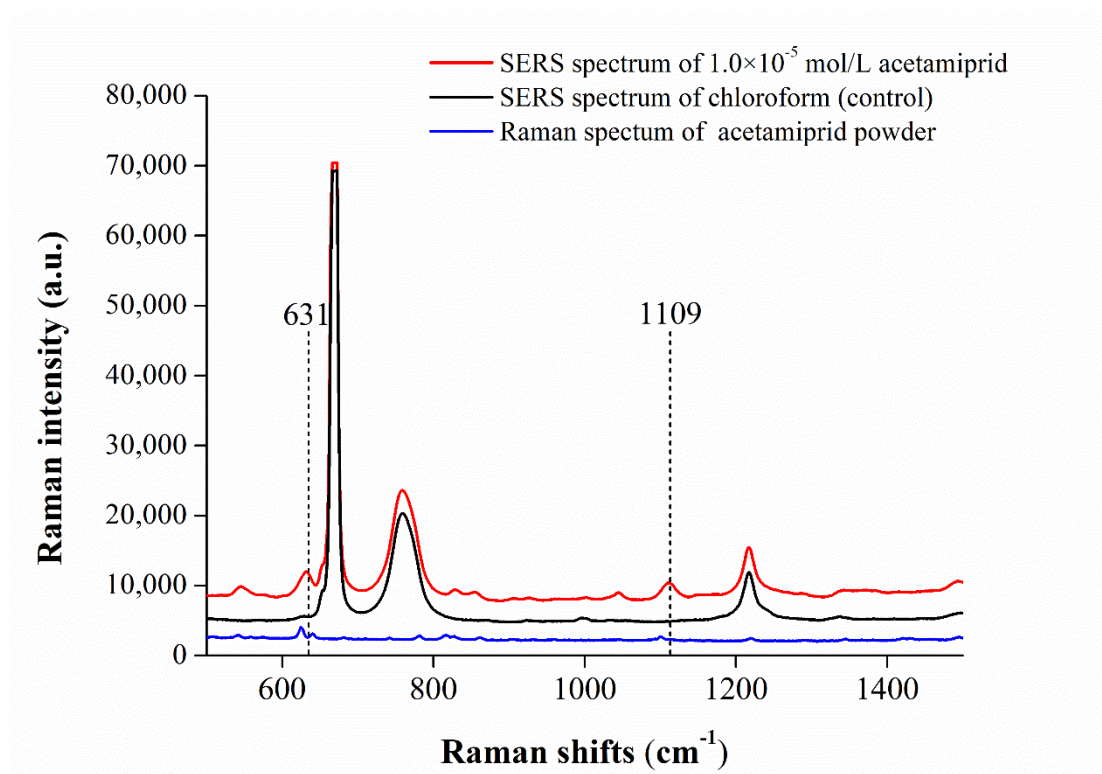

**Figure. S2.** SERS spectrum of acetamiprid at  $1.0 \times 10^{-5}$  mol/L, SERS spectrum of chloroform and Raman spectrum of acetamiprid powder.

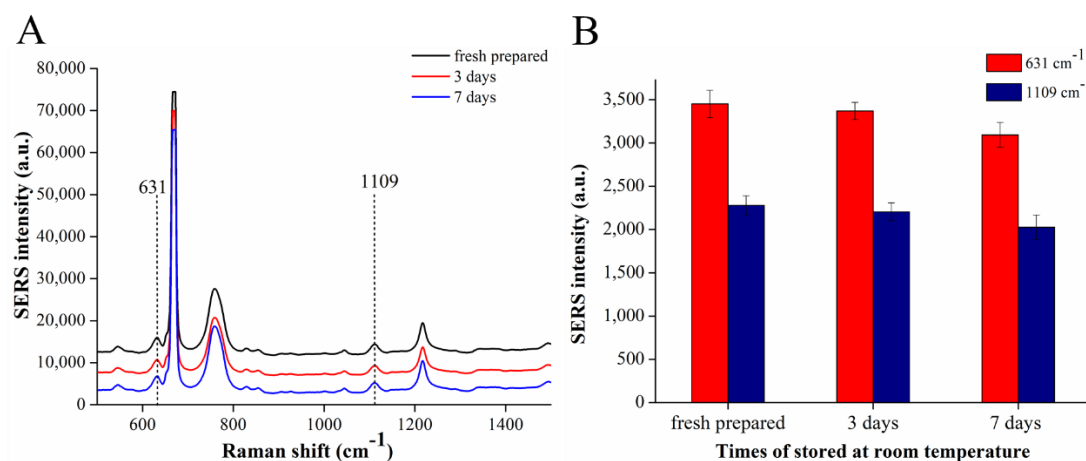

**Figure.S3.** (A) SERS spectra of acetamiprid collected with fresh prepared Au NP array and Au NP array stored at room temperature for 3 days and 7 days. (B) Comparison of the intensities of characteristic SERS signals of acetamiprid at Raman shift of  $631 \text{ cm}^{-1}$  and  $1109 \text{ cm}^{-1}$ .

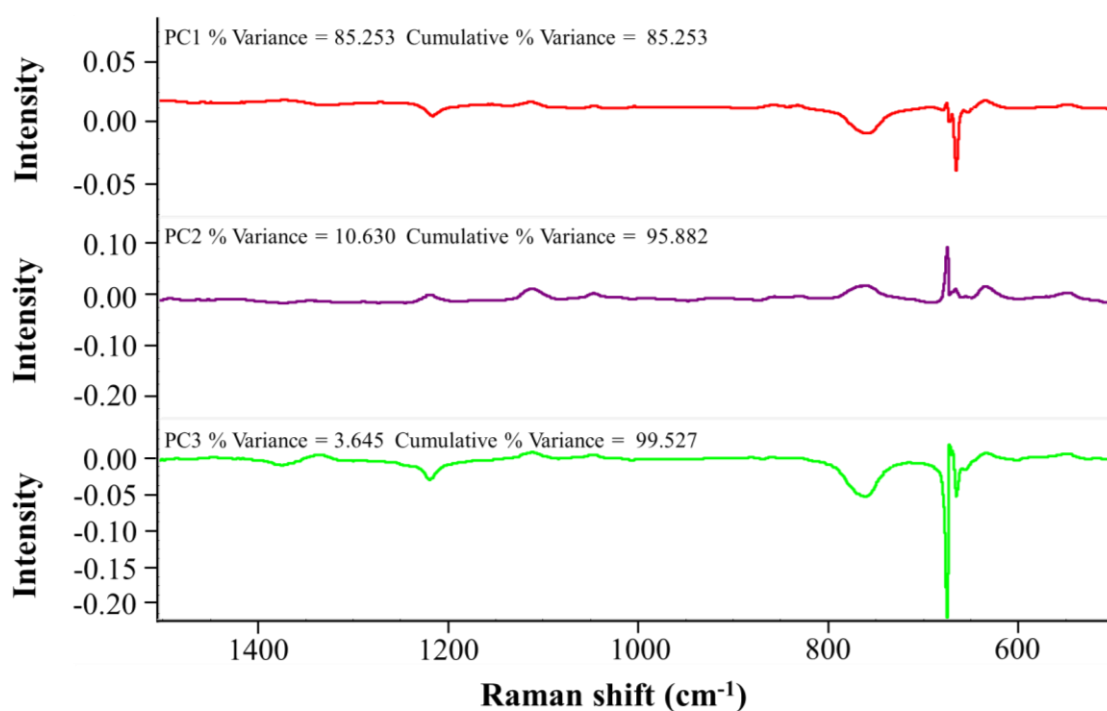

**Figure. S4.** The loading plots for the first 3 components which were used in PCA.

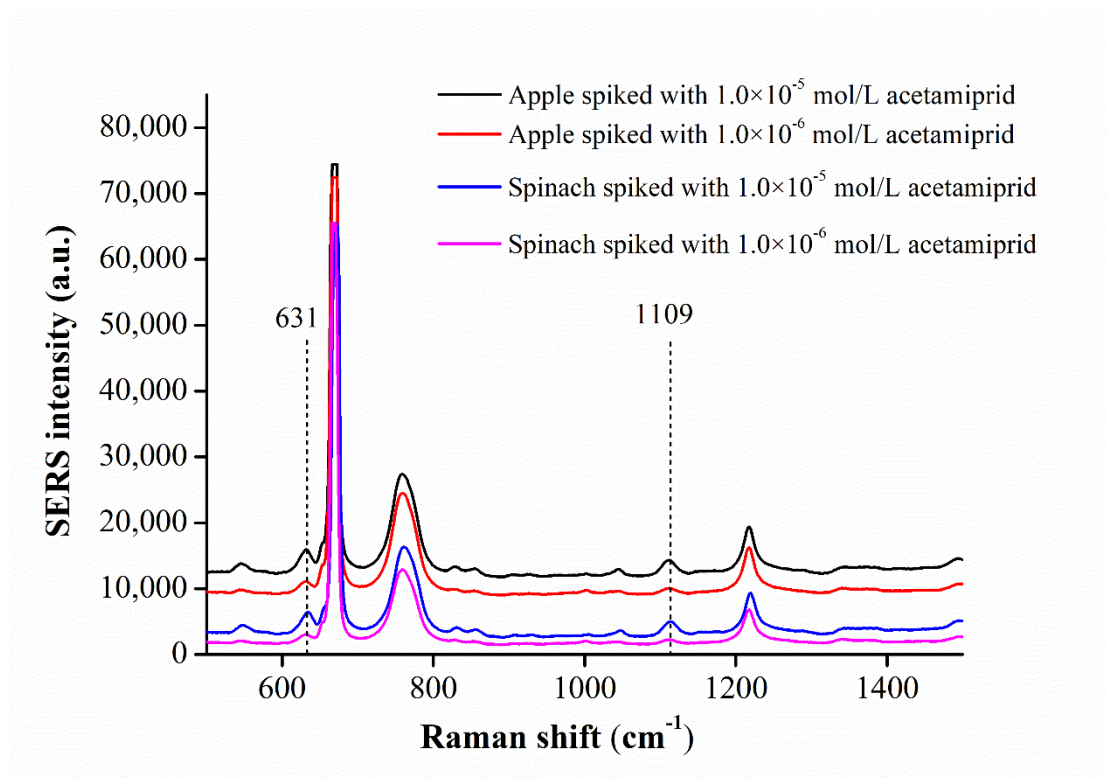

**Figure. S5.** SERS spectra of acetamiprid determination in apple and spinach spiked with acetamiprid at the concentration of  $1.0 \times 10^{-5}$  mol/L and  $1.0 \times 10^{-6}$  mol/L.
